# Supplementary material for: Natural Sequence Variations and Combinations of GNP1 and NAL1 Determine the Grain Number per Panicle in Rice
Source: PubMed Central journal article supplement (PMC7048901; doi:10.1186/s12284-020-00374-8), 2020-02-28
Supplement: 12284_2020_374_MOESM12_ESM.pdf [file 12284_2020_374_MOESM12_ESM.pdf]

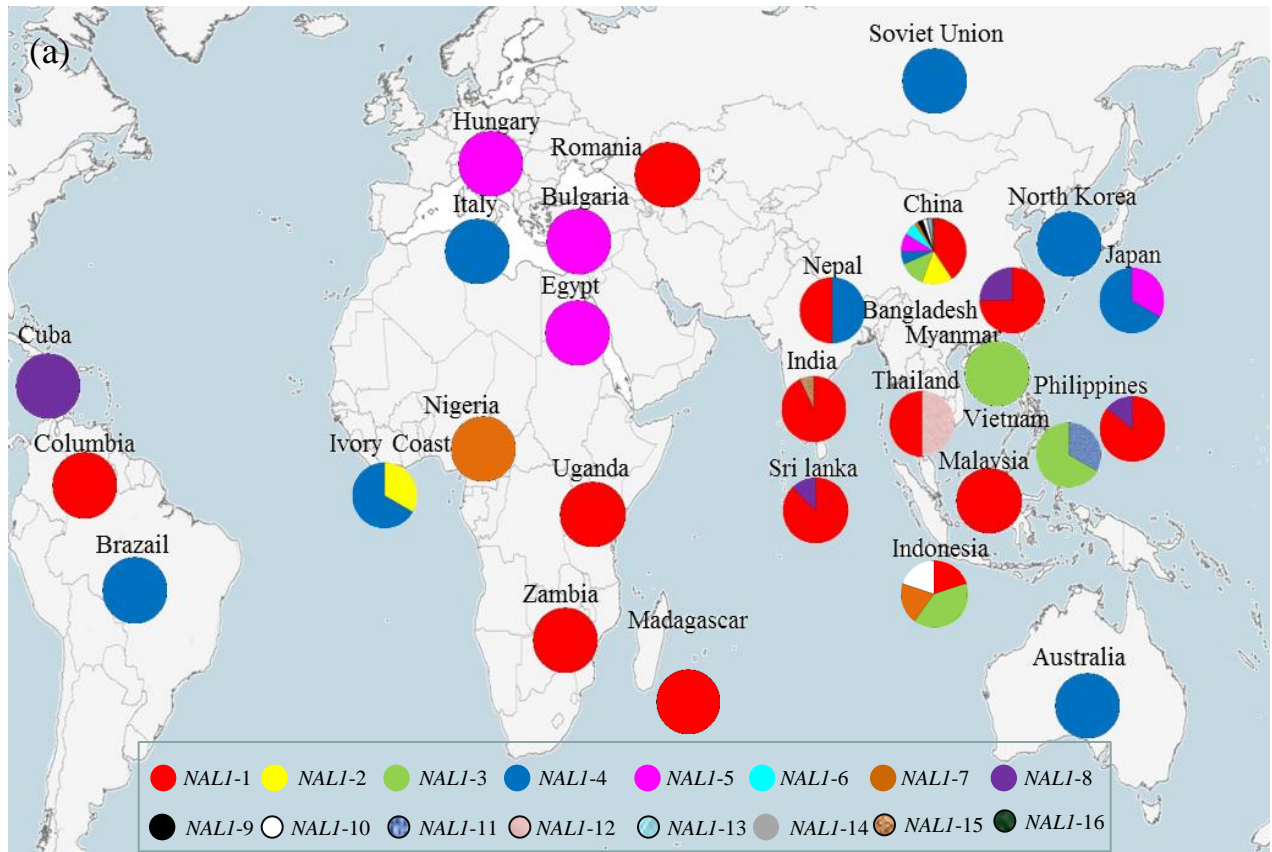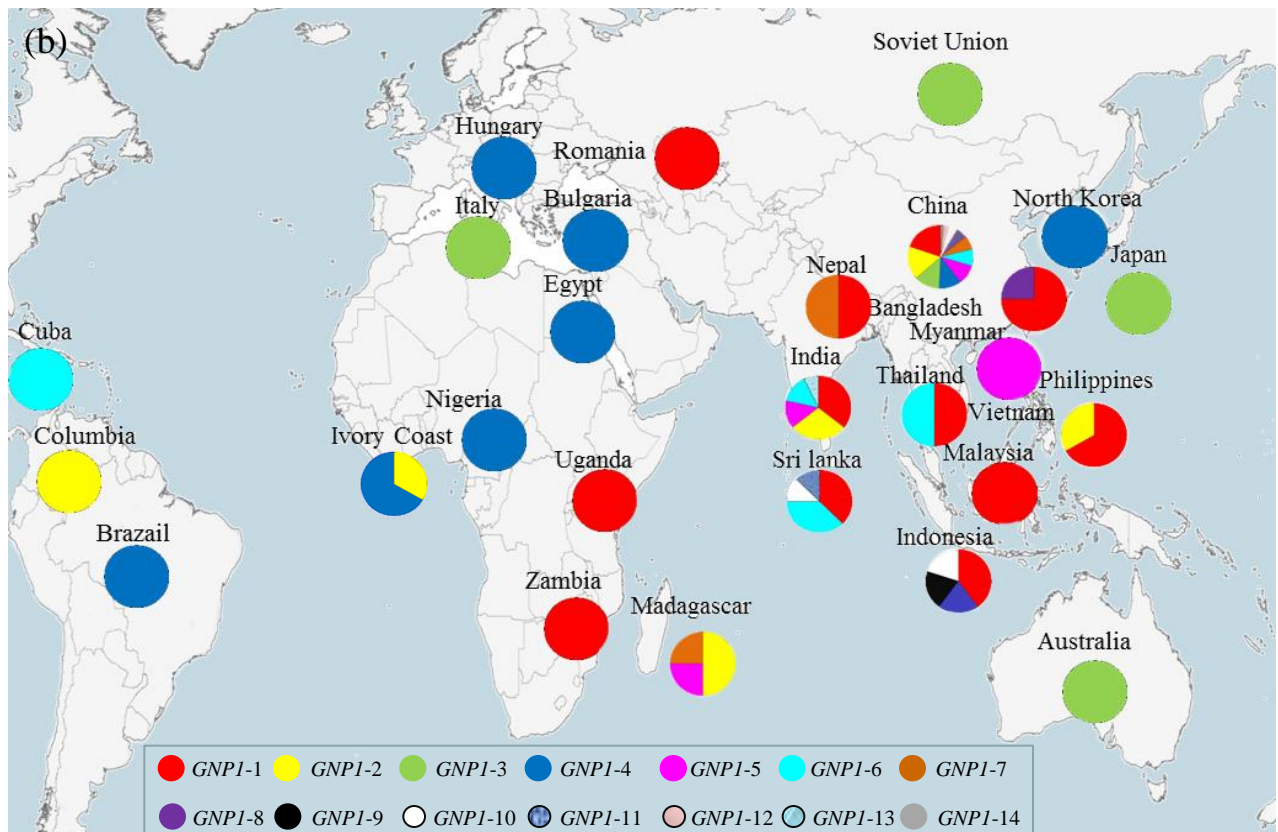

**Additional file 12:Figure S8** Geographic distributions of different haplotypes of *NALI* (a) and *GNPI* (b) among the 28 areas sampled. Each circle is constructed with the respective frequencies of these haplotypes at each locality.
